# Supplementary material for: Dynamic Modulation of the Gut Microbiota and Metabolome by Bacteriophages in a Mouse Model
Source: PubMed Central journal article supplement (PMC6579560; doi:10.1016/j.chom.2019.05.001), 2019-06-12
Supplement: mmc1.pdf [file mmc1.pdf]

**Cell Host & Microbe, Volume 25**

**Supplemental Information**

**Dynamic Modulation of the Gut Microbiota and  
Metabolome by Bacteriophages in a Mouse Model**

**Bryan B. Hsu, Travis E. Gibson, Vladimir Yeliseyev, Qing Liu, Lorena Lyon, Lynn  
Bry, Pamela A. Silver, and Georg K. Gerber**

**Table S1 | Infectivity range of phages against human commensal gut bacteria. Related to Figure 1.** Phages were spotted onto lawns of each bacteria and incubated anaerobically overnight at 37°C. Zones of clearing indicated infectivity. (+) = lysis; (-) = no lysis

| <i>Bacteria</i>       | <i>Phages</i> |    |       |      |
|-----------------------|---------------|----|-------|------|
|                       | T4            | F1 | B40-8 | VD13 |
| <i>A. muciniphila</i> | -             | -  | -     | -    |
| <i>B. fragilis</i>    | -             | -  | +     | -    |
| <i>B. ovatus</i>      | -             | -  | -     | -    |
| <i>B. vulgatus</i>    | -             | -  | -     | -    |
| <i>C. sporogenes</i>  | -             | +  | -     | -    |
| <i>E. faecalis</i>    | -             | -  | -     | +    |
| <i>E. coli</i>        | +             | -  | -     | -    |
| <i>K. oxytoca</i>     | -             | -  | -     | -    |
| <i>P. distasonis</i>  | -             | -  | -     | -    |
| <i>P. mirabilis</i>   | -             | -  | -     | -    |

**Table S2 | Summarized effect of bacteria and phages on fecal metabolites. Related to Figures 5 and S5.** Metabolites with significant changes were categorized into KEGG pathway and direction of change (e.g., increase or decrease).

| KEGG Pathway           | Number of screened metabolites | Metabolites significantly changing (adj. <i>p</i> -value < 0.05) |                 |                 |                 |                                                        |                 |                 |                 |                                                                    |                 |                 |                 |
|------------------------|--------------------------------|------------------------------------------------------------------|-----------------|-----------------|-----------------|--------------------------------------------------------|-----------------|-----------------|-----------------|--------------------------------------------------------------------|-----------------|-----------------|-----------------|
|                        |                                | Bacteria only<br><i>versus</i><br>GF                             |                 |                 |                 | +T4/F1 Phages (+13d)<br><i>versus</i><br>Bacteria only |                 |                 |                 | +VD13/B40-8 Phages (+13d)<br><i>versus</i><br>+T4/F1 Phages (+13d) |                 |                 |                 |
|                        |                                | Decreasing<br>#                                                  | % of<br>Pathway | Increasing<br># | % of<br>Pathway | Decreasing<br>#                                        | % of<br>Pathway | Increasing<br># | % of<br>Pathway | Decreasing<br>#                                                    | % of<br>Pathway | Increasing<br># | % of<br>Pathway |
| Amino acids            | 203                            | 21                                                               | 10.3%           | 145             | 71.4%           | 3                                                      | 1.5%            | 30              | 14.8%           | 5                                                                  | 2.5%            | 0               | 0.0%            |
| Peptides               | 37                             | 6                                                                | 16.2%           | 22              | 59.5%           | 2                                                      | 5.4%            | 3               | 8.1%            | 0                                                                  | 0.0%            | 0               | 0.0%            |
| Carbohydrates          | 31                             | 12                                                               | 38.7%           | 13              | 41.9%           | 4                                                      | 12.9%           | 6               | 19.4%           | 0                                                                  | 0.0%            | 0               | 0.0%            |
| Energy                 | 12                             | 0                                                                | 0.0%            | 7               | 58.3%           | 0                                                      | 0.0%            | 0               | 0.0%            | 0                                                                  | 0.0%            | 0               | 0.0%            |
| Lipids                 | 356                            | 49                                                               | 13.8%           | 193             | 54.2%           | 40                                                     | 11.2%           | 13              | 3.7%            | 1                                                                  | 0.3%            | 0               | 0.0%            |
| Nucleotides            | 63                             | 18                                                               | 28.6%           | 33              | 52.4%           | 0                                                      | 0.0%            | 9               | 14.3%           | 0                                                                  | 0.0%            | 0               | 0.0%            |
| Cofactors/<br>Vitamins | 45                             | 6                                                                | 13.3%           | 25              | 55.6%           | 0                                                      | 0.0%            | 11              | 24.4%           | 0                                                                  | 0.0%            | 0               | 0.0%            |
| Xenobiotics            | 113                            | 15                                                               | 13.3%           | 76              | 67.3%           | 12                                                     | 10.6%           | 13              | 11.5%           | 0                                                                  | 0.0%            | 0               | 0.0%            |
|                        |                                | 127                                                              | 14.8%           | 514             | 59.8%           | 61                                                     | 7.1%            | 85              | 9.9%            | 6                                                                  | 0.7%            | 0               | 0.0%            |
| <i>Overall</i>         | 860                            | 641 (74.6%)                                                      |                 |                 |                 | 146 (17.0%)                                            |                 |                 |                 | 6 (0.7%)                                                           |                 |                 |                 |

**Table S3 | Protein homologs of tryptophan decarboxylases that produce tryptamine in the defined consortia. Related to Figure 5.** Homologous sequences were identified by protein BLAST against each strain of bacteria in the defined consortia. When strain sequences were unavailable, homology was compared to all species in the non-redundant protein sequences database.

| Bacteria                          | Consortia strain | Homology of tryptophan decarboxylases   |                                  |            |           |             |         |                                             |                                  |            |           |            |         |
|-----------------------------------|------------------|-----------------------------------------|----------------------------------|------------|-----------|-------------|---------|---------------------------------------------|----------------------------------|------------|-----------|------------|---------|
|                                   |                  | <i>R. gnavus</i> derived (rumgna_01526) |                                  |            |           |             |         | <i>C. sporogenes</i> derived (clospo_02083) |                                  |            |           |            |         |
|                                   |                  | Strain (or strain of closest homolog)   | Sequence ID (or closest homolog) | Percent ID | AA length | Bit Score   | E value | Strain (or strain of closest homolog)       | Sequence ID (or closest homolog) | Percent ID | AA length | Bit Score  | E value |
| <i>Bacteroides fragilis</i>       | HSP40*           | S6L5                                    | EYE60564.1                       | 28%        | 72        | 33.9 (76)   | 2.6     | 3_1_12                                      | EFR53885.1                       | 30%        | 168       | 52.8 (125) | 2E-06   |
| <i>Clostridium sporogenes</i>     | 213*             | Isolate (Accession KRU25053)            | KRU25053.1                       | 27%        | 471       | 157 (398)   | 1E-41   | ATCC 15579                                  | EDU35915.1                       | 100%       | 417       | 864 (2232) | 0       |
| <i>Enterococcus faecalis</i>      | ATCC 29200       | -                                       | -                                | 0%         | -         | -           | -       | ATCC 29200                                  | EOJ09602.1                       | 28%        | 21        | 53.9 (128) | 1E-06   |
| <i>Escherichia coli</i>           | Nissle 1917      | -                                       | -                                | 0%         | -         | -           | -       | Nissle 1917                                 | AID78574.1                       | 31%        | 86        | 49.7 (117) | 2E-05   |
| <i>Akkermansia muciniphila</i>    | ATCC BAA-835     | -                                       | -                                | 0%         | -         | -           | -       | ATCC BAA-835                                | ACD04211.1                       | 25%        | 244       | 59.7 (143) | 1E-08   |
| <i>Bacteroides ovatus</i>         | ATCC 8483        | -                                       | -                                | 0%         | -         | -           | -       | ATCC 8483                                   | EDO14168.1                       | 30%        | 168       | 52.0 (123) | 4E-06   |
| <i>Bacteroides vulgatus</i>       | ATCC 8482        | -                                       | -                                | 0%         | -         | -           | -       | ATCC 8482                                   | ABR41498.1                       | 29%        | 165       | 53.5 (127) | 1E-06   |
| <i>Klebsiella oxytoca</i>         | ATCC 700324*     | Isolate (Accession SAP40428)            | SAP40428.1                       | 30%        | 410       | 208 (530)   | 1E-60   | Isolate (Accession SAQ33394)                | SAQ33394.1                       | 28%        | 280       | 106 (256)  | 2E-24   |
| <i>Parabacteroides distasonis</i> | ATCC 8503        | -                                       | -                                | 0%         | -         | -           | -       | ATCC 8503                                   | ABR42591.1                       | 30%        | 168       | 52.0 (123) | 4E-06   |
| <i>Proteus mirabilis</i>          | ATCC 29906       | -                                       | -                                | 0%         | -         | -           | -       | ATCC 29906                                  | EEl48912.1                       | 22%        | 357       | 59.7 (143) | 1E-08   |
| <i>Ruminococcus gnavus</i>        | -                | ATCC 29149                              | EDN78222.1                       | 100%       | 490       | 1024 (2647) | 0       | -                                           | -                                | 0%         | -         | -          | -       |

\* No genome sequence available for this strain so the sequence with greatest homology was used



**Table S4 | Protein homologs of tyrosine decarboxylases that produce tyramine in the defined consortia. Related to Figure 5.** Homologous sequences were identified by protein BLAST against each strain of bacteria in the defined consortia. When strain sequences were unavailable, homology was compared to all species in the non-redundant protein sequences database.

| Bacteria                          | Consortia strain | Homology of tyrosine decarboxylases         |                                        |            |              |                |            |
|-----------------------------------|------------------|---------------------------------------------|----------------------------------------|------------|--------------|----------------|------------|
|                                   |                  | <i>E. faecalis</i> derived ( <i>tyrDC</i> ) |                                        |            |              |                |            |
|                                   |                  | Strain<br>(or strain of<br>closest homolog) | Sequence ID<br>(or closest<br>homolog) | Percent ID | AA<br>length | Bit Score      | E<br>value |
| <i>Bacteroides fragilis</i>       | HSP40*           | -                                           | -                                      | 0%         | -            | -              | -          |
| <i>Clostridium sporogenes</i>     | 213*             | ATCC 15579                                  | EDU35915.1                             | 28%        | 417          | 60.8<br>(146)  | 1E-08      |
| <i>Enterococcus faecalis</i>      | ATCC 29200       | ATCC 29200                                  | EOJ09602.1                             | 100%       | 620          | 1274<br>(3298) | 0          |
| <i>Escherichia coli</i>           | Nissle 1917      | -                                           | -                                      | 0%         | -            | -              | -          |
| <i>Akkermansia muciniphila</i>    | ATCC BAA-835     | -                                           | -                                      | 0%         | -            | -              | -          |
| <i>Bacteroides ovatus</i>         | ATCC 8483        | -                                           | -                                      | 0%         | -            | -              | -          |
| <i>Bacteroides vulgatus</i>       | ATCC 8482        | -                                           | -                                      | 0%         | -            | -              | -          |
| <i>Klebsiella oxytoca</i>         | ATCC 700324*     | Isolate<br>(Accession<br>FKZE01000017)      | SAQ17440.1                             | 29%        | 489          | 73.9<br>(180)  | 9E-13      |
| <i>Parabacteroides distasonis</i> | ATCC 8503        | -                                           | -                                      | 0%         | -            | -              | -          |
| <i>Proteus mirabilis</i>          | ATCC 29906       | ATCC 29906                                  | EEl49344.1                             | 28%        | 610          | 231 (589)      | 1E-66      |

\* No genome sequence available for this strain so the sequence with greatest homology was used

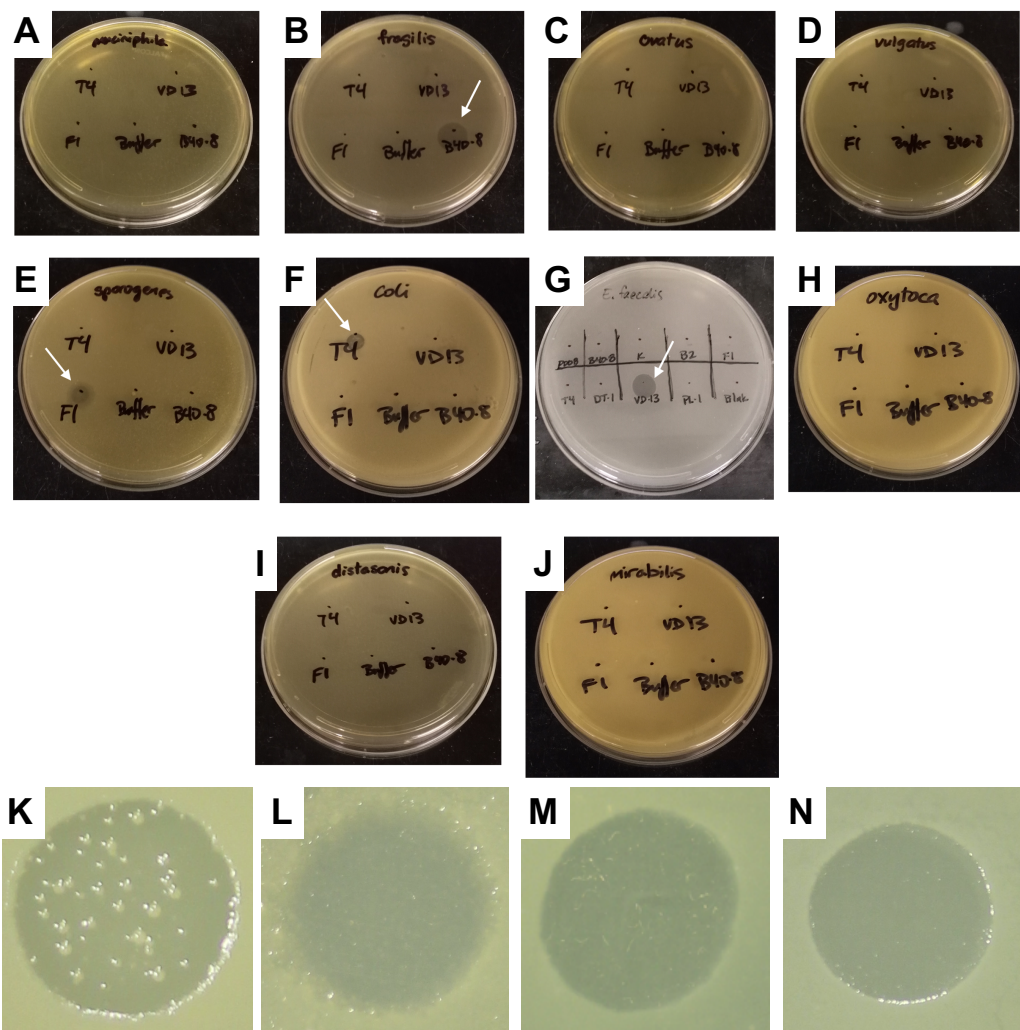

**Figure S1 | Spot tests of phage against each bacteria in the defined consortia. Related to Figure 1.** Phages were spotted onto lawns of each bacteria and incubated overnight 37°C. Zones of clearing indicate infectivity. Bacterial lawns were (A) *A. muciniphila*, (B) *B. fragilis*, (C) *B. ovatus*, (D) *B. vulgatus*, (E) *C. sporogenes*, (F) *E. coli*, (G) *E. faecalis*, (H) *K. oxytoca*, (I) *P. distasonis*, and (J) *P. mirabilis*. Higher-resolution images focused on the zones of clearing are shown for (K) T4 phage on *E. coli*, (L) F1 phage on *C. sporogenes*, (M) B40-8 phage on *B. fragilis*, and (N) VD13 phage on *E. faecalis*.

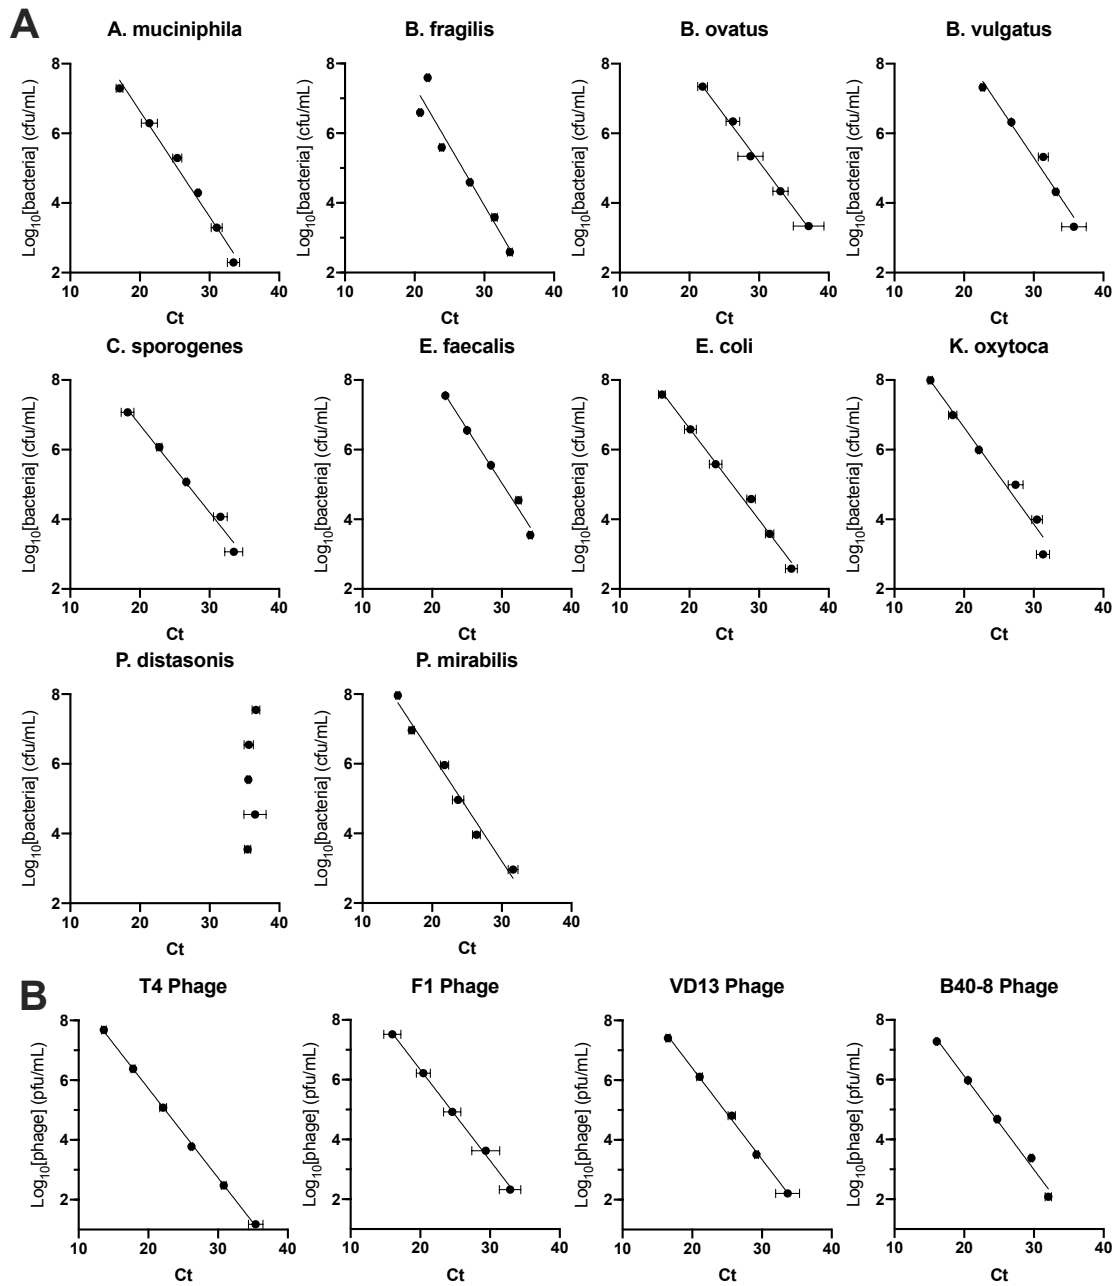

**Figure S2 | Representative qPCR standard curves for universal 16S rRNA primers and phage-specific primers. Related to Figures 1 and 2.** Standard curves generated from quantitative PCR measurements of diluted (A) bacteria using universal 16S rRNA TaqMan primers and probe yielding total bacterial load, and (B) standard curves using phage-specific qPCR primers yielding the titer of each individual phage. Note that *P. distasonis* was poorly amplified by the 16S rRNA TaqMan primers.

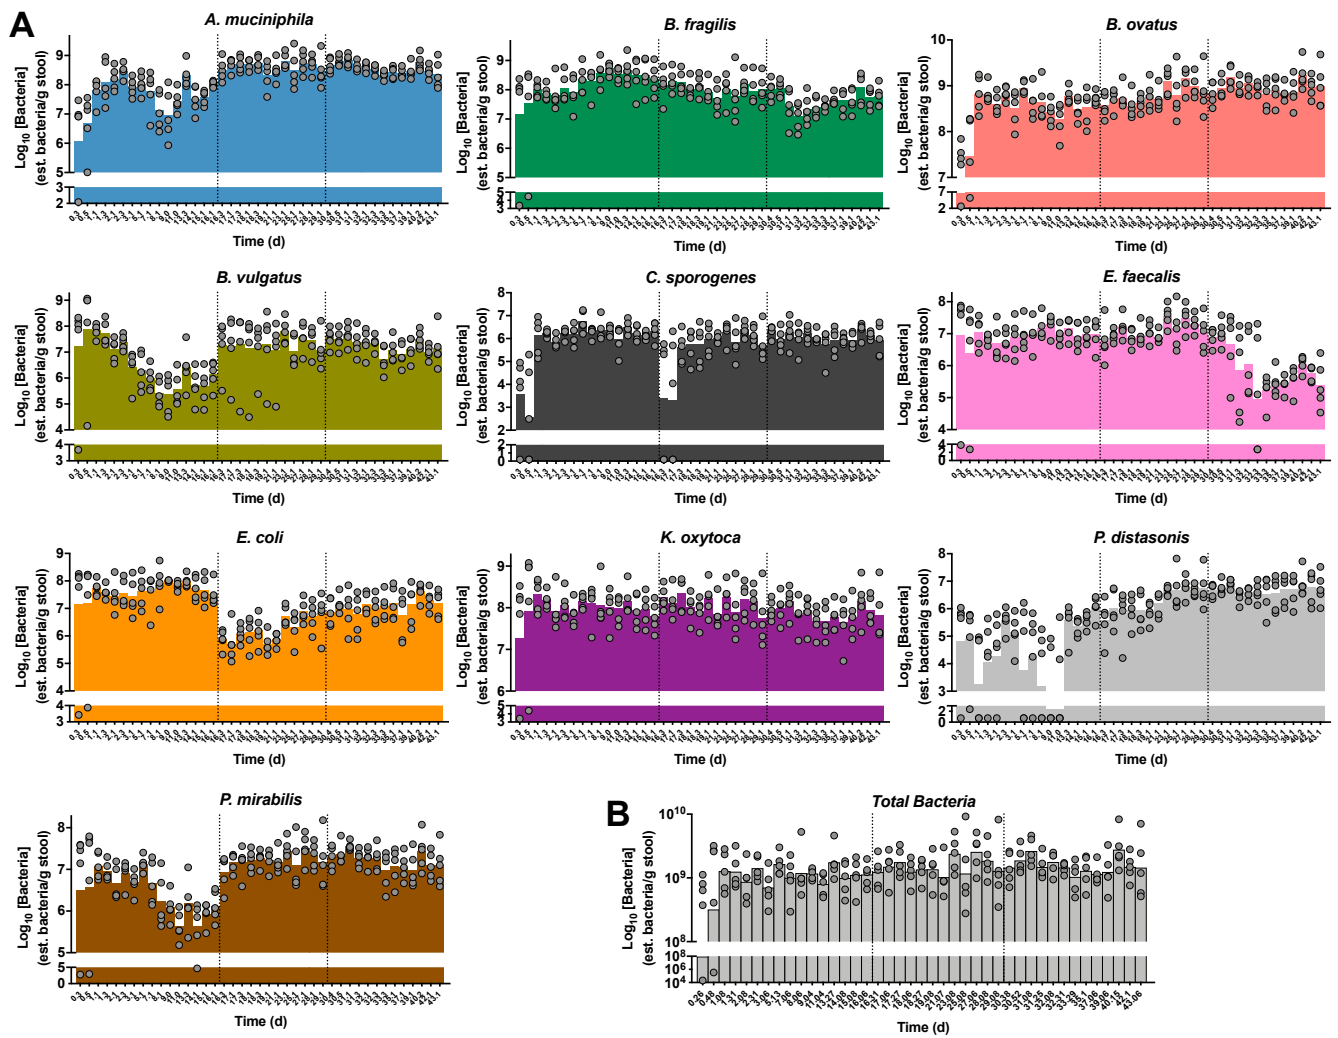

**Figure S3 | Fecal bacterial concentrations over time. Related to Figure 2. (A)** Fecal abundances of each bacterial species or (B) total bacteria with the symbols representing the estimated bacterial concentration measured from each mouse with the bars representing the geometric means calculated from all individually-housed mice ( $n = 5$ ). The y-axis is plotted in Log<sub>10</sub>-scale. Vertical dashes represent administration of T4 and F1 phages, then B40-8 and VD13 phages, respectively.

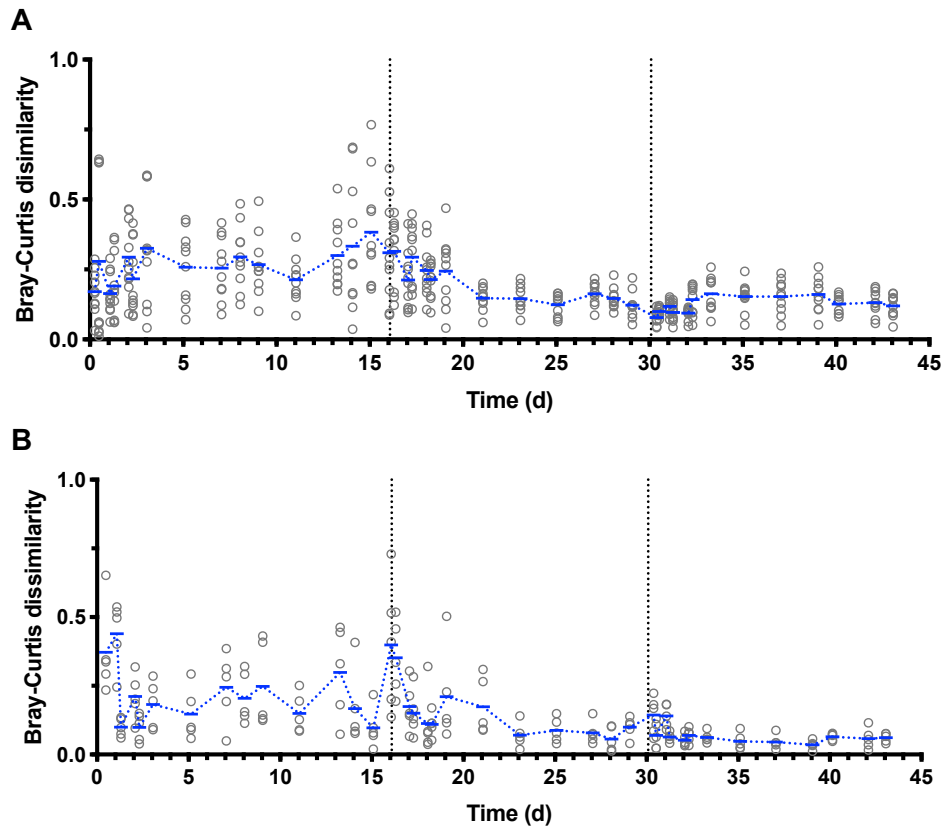

**Figure S4 | Bray-Curtis measures of dissimilarity. Related to Figure 2.** The dissimilarity in bacterial microbiota compositions was determined (A) between each pair of mice (5 mice; each symbol represents one of ten total comparisons) for each timepoint and (B) between timepoints comparing one sample to that immediately prior within each mouse (5 mice; each symbol represents one of five total comparisons).

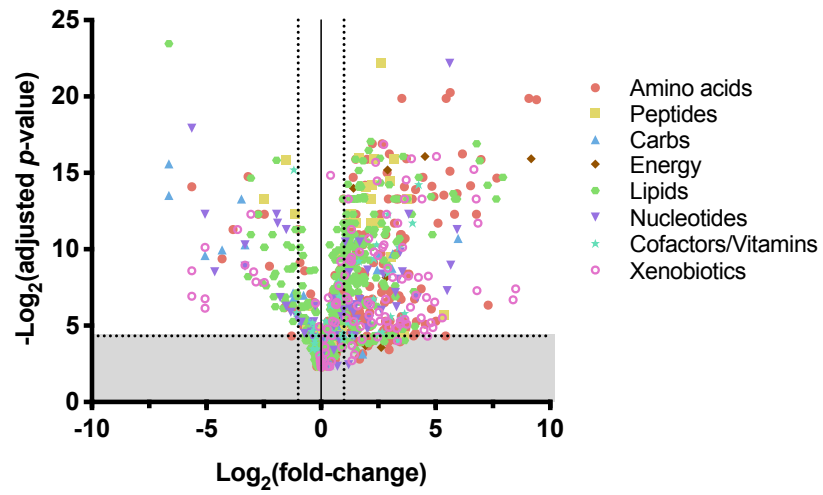

**Figure S5 | Volcano plot of the effect of bacterial colonization on the fecal metabolome. Related to Figure 5.** Points above the horizontal dashed line indicate significant changes with adjusted  $p$ -values  $< 0.05$ .
